# Supplementary material
Source: PubMed Central journal article supplement (PMC6474839)

**Title:** Preconditioning in the rhesus macaque induces a proteomic signature following cerebral ischemia that is associated with neuroprotection.

**Journal:** Translational Stroke Research

**Authors:** Susan L Stevens, Tao Liu, Frances Rena Bahjat, Vladislav A. Petyuk, Athena A. Schepmoes, Ryan L. Sontag, Marina A. Gritsenko, Chaochao Wu, Sheng Wang, Anil K. Shukla, Jon M. Jacobs, Richard D. Smith, Karin D. Rodland, G. Alexander West, Steven G. Kohama, Christine Glynn, Mary P. Stenzel-Poore

**Corresponding Author:** Dr. Mary Stenzel-Poore; Department of Molecular Microbiology and Immunology, Oregon Health & Science University, Portland, Oregon, USA; E-mail: poorem@ohsu.edu.

**Supplemental Figure 1. Relative expression of neuroprotective cluster proteins not significantly upregulated compared to naive.**

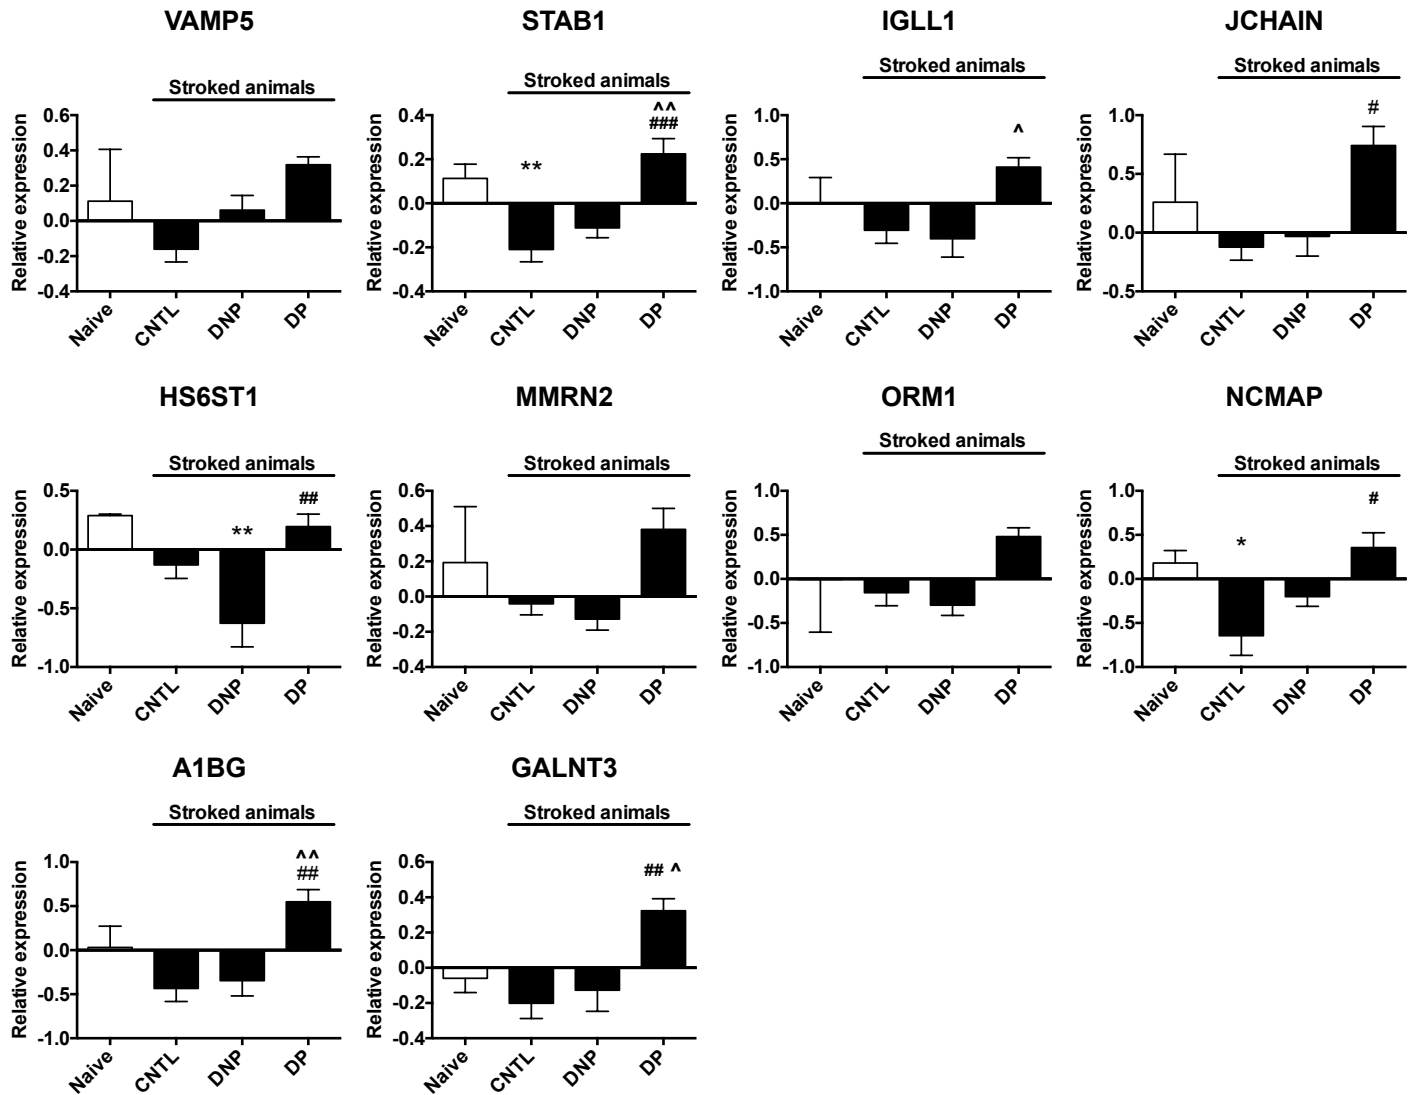

Supplement: NIHMS1510097-supplement-12975_2018_670_MOESM1_ESM.pdf [file NIHMS1510097-supplement-12975_2018_670_MOESM1_ESM.pdf]
