# Supplementary material
Source: PubMed Central journal article supplement (PMC6474839)
Supplement: NIHMS1510097-supplement-12975_2018_670_MOESM2_ESM.pdf [file NIHMS1510097-supplement-12975_2018_670_MOESM2_ESM.pdf]

**Title:** Preconditioning in the rhesus macaque induces a proteomic signature following cerebral ischemia that is associated with neuroprotection.

**Journal:** Translational Stroke Research

**Authors:** Susan L. Stevens, Tao Liu, Frances Rena Bahjat, Vladislav A. Petyuk, Athena A. Schepmoes, Ryan L. Sontag, Marina A. Gritsenko, Chaochao Wu, Sheng Wang, Anil K. Shukla, Jon M. Jacobs, Richard D. Smith, Karin D. Rodland, G. Alexander West, Steven G. Kohama, Christine Glynn, Mary P. Stenzel-Poore

**Corresponding Author:** Dr. Mary Stenzel-Poore; Department of Molecular Microbiology and Immunology, Oregon Health & Science University, Portland, Oregon, USA; E-mail: poorem@ohsu.edu

**Supplementary Table 1: TMT-10 Labeling Scheme**

| Channel | 126   | 127N  | 127C  | 128N  | 128C   | 129N | 129C   | 130N   | 130C   | 131       |
|---------|-------|-------|-------|-------|--------|------|--------|--------|--------|-----------|
| TMT1    | CNTL1 | CNTL2 | CNTL3 | CNTL4 | CNTL5  | DP1  | DP2    | DP3    | NRS    | reference |
| TMT2    | DP4   | NRS   | DP5   | DNP1  | DNP2   | DP3  | NRS    | DNP4   | DNP5   | reference |
| TMT3    | NRS   | NRS   | NRS   | NRS   | Naive1 | NRS  | Naive2 | Naive3 | Naive4 | reference |

NRS: NHP CSF samples not related to study
